# Supplementary material
Source: Springer Nature journal article supplement (https://www.springermedizin.de/resource/supplementary/13099_2013_97_MOESM8_ESM.pdf/9665536)

**a**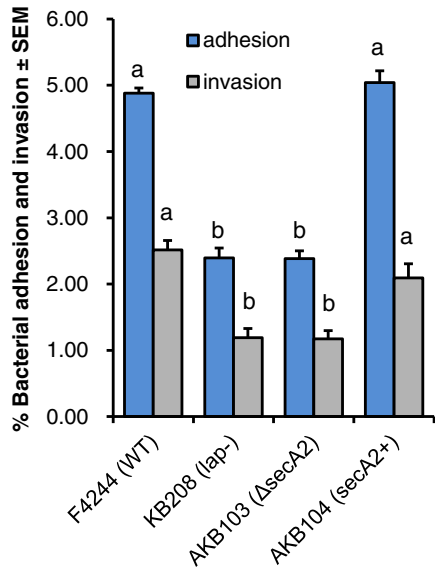**b**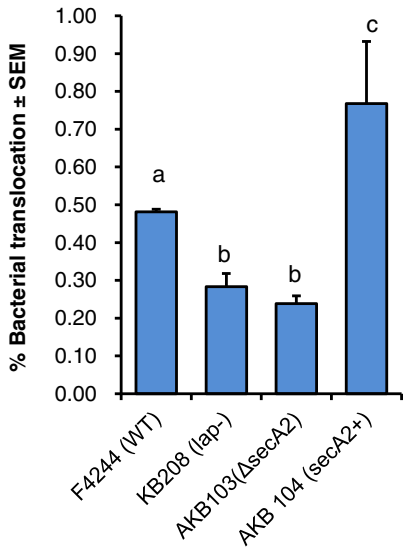

Supplement: MOESM8 [file 9665536]
